# Supplementary material
Source: MDPI journal article supplement (https://www.mdpi.com/2073-4441/13/16/2153)
Supplement: s1 [file s1]

# **Socio-Institutional factors influencing groundwater contamination in low-income peri-urban areas, Kampala city**

## **Interview Guide**

- (1) In your opinion, to what extent do residents in peri-urban areas use groundwater (shallow wells/springs) in Kampala? What are the alternative sources?
- (2) Please explain the main reasons some people use groundwater in peri-urban areas compared to the other sources?
- (3) What are the main groundwater quality concerns in peri-urban areas in Kampala? How have changes in socio-economic activities in peri-urban areas contributed to groundwater contamination?
- (4) Please explain how the existing institutional framework contributes to resolve the challenge of peri-urban groundwater contamination in Kampala city?
- (5) Specifically, please explain the coordination mechanisms between different institutional actors in addressing groundwater quality challenges in peri-urban areas.
- (6) Please describe the role played by non-state actors/educational institutions in addressing the challenge?
- (7) Are there any informal actors/arrangements influencing groundwater quality?
- (8) How has the sector policy/regulatory framework contributed to resolving the challenge of peri-urban groundwater contamination?
- (9) How has the political environment contributed to resolving the challenge of peri-urban groundwater contamination?
- (10) Do you know of any other factors contributing to groundwater contamination in peri-urban areas in Kampala city?

## **Transition Arena Guide**

### **Problem Structuring**

- (1) What are the main problems in your community?
- (2) Why do these problems persist?
- (3) What are the causes of these problems?

### **Reflecting on problems and envisioning (Focusing on on-site sanitation)**

- (1) How did I and the community contribute to this problem?
- (2) What would I do differently next time?
- (3) How do you see yourself, your children and the community in future in relation to water, sanitation and solid waste?
- (4) What are the values, principles and practices underlying your future vision?

### **Agenda setting**

- (1) How do we get to your vision in the short, medium and long term??
- (2) What are the changes in practices, behaviours and structures?
